# Supplementary material for: Metamagnetism and slow magnetic dynamics in an antiferromagnet composed of cobalt(ii) chains with mixed azide–carboxylate bridges
Source: Royal Society of Chemistry journal article supplement (doi:10.1039/c0cc04492j), 2010-12-06
Supplement: c0cc04492j.pdf [file c0cc04492j.pdf]

## Electronic supplementary information (ESI)

### Metamagnetism and slow magnetic dynamics in an antiferromagnet composed of cobalt(II) chains with mixed azide-carboxylate bridges

Xiu-Mei Zhang, Yan-Qin Wang, Kun Wang, En-Qing Gao \* and Cai-Ming Liu

**Synthesis of 1:** A mixture solution of  $\text{Co}(\text{ClO}_4)_2 \cdot 6\text{H}_2\text{O}$  (0.036 g, 0.1 mmol),  $\text{NaN}_3$  (0.016 g, 0.25 mmol), and **L** (0.024 g, 0.1 mmol) in water (4 ml) and DMF (1.5 ml) was sealed in a Teflon-lined stainless steel vessel (25 ml), heated at 70°C for 3 days, and then cooled to room temperature. Red plate crystals of **1** were obtained in a yield of 80% based on Co. Anal. Calcd for  $\text{CoC}_{14}\text{H}_{12}\text{N}_4\text{O}_5$ : C, 44.82; H, 3.22; N, 14.93. Found: C, 44.85; H, 3.34; N, 14.96. Main IR bands (KBr,  $\text{cm}^{-1}$ ): 2080s [ $\nu(\text{N}_3)$ ], 1625s, [ $\nu_{\text{as}}(\text{COO})$ ], 1382s [ $\nu_{\text{s}}(\text{COO})$ ].

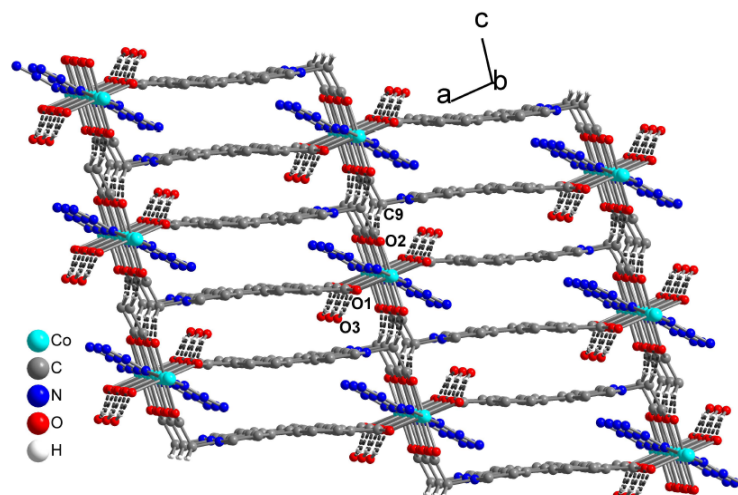

**Fig. S1.** 3D packing of the layers through hydrogen bonding interactions in **1**. For the interlayer interaction,  $\text{C9-H9}\cdots\text{O2}(1-x, y, 2-z) = 169.2(2)^\circ$ ,  $\text{H}\cdots\text{O} = 2.132(2) \text{ \AA}$ , and  $\text{C}\cdots\text{O} = 3.213(9) \text{ \AA}$ ; for the interaction involving the lattice water molecule,  $\text{O3-H3B}\cdots\text{O1}(x, -y, z) = 171.3(1)^\circ$ ,  $\text{H}\cdots\text{O1} = 2.260(2) \text{ \AA}$ , and  $\text{O}\cdots\text{O} = 3.089(9) \text{ \AA}$ . Each water molecule for two equivalent hydrogen bonds with carboxylate oxygen atoms from two adjacent ligands.

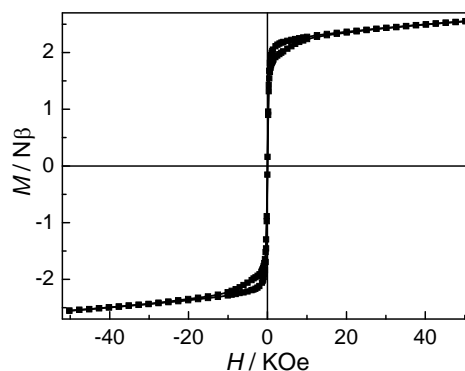

**Fig. S2** Isothermal magnetization of **1** at 2 K.

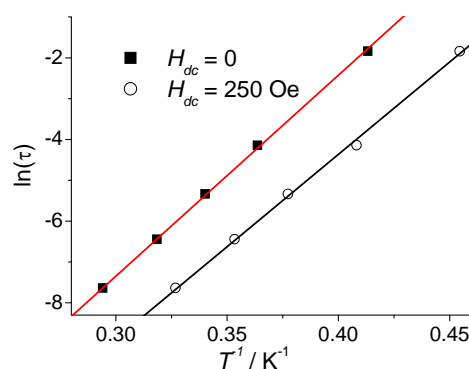

**Fig. S3** Arrhenius plots and best linear fits for **1** at zero dc field (solid squares) and 250 Oe dc field (circles)

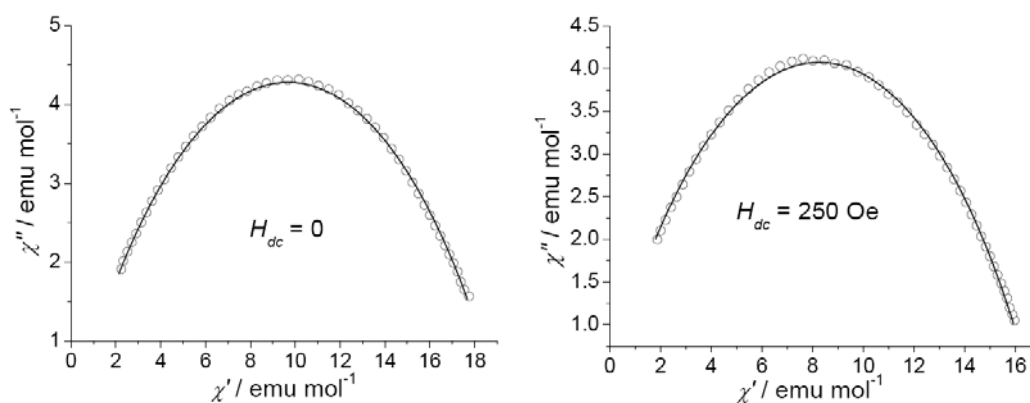

**Fig. S4.** Cole-Cole diagrams in the absence (left) and in the presence (right) of dc field. The data were measured by varying the frequency from 1 to 1000 Hz with a driving ac field of 2.5 Oe at  $T = 3.0$  K and  $H_{dc} = 0$ , or  $T = 2.8$  K and  $H_{dc} = 250$  Oe. The solid curves represent the least-square fit to a generalized Debye model. References: (a) K. S. Cole, R. H. Cole, *J. Chem. Phys.* 1941, **9**, 341. (b) C. J. F. Boettcher, *Theory of Electric Polarisation*, Elsevier, Amsterdam, 1952. (c) S. M. Aubin, Z. Sun, L. Pardi, J. Krzysteck, K. Folting, L. J. Brunel, A. L. Rheingold, G. Christou, D. N. Hendrickson, *Inorg. Chem.* 1999, **38**, 5329.
